# The Evolution of Primate Body Size: Left-skewness, Maximum Size, and Cope's Rule

Richard C. Tillquist,<sup>1,2</sup> Lauren G. Shoemaker,<sup>2,3</sup> Kevin Bracy Knight,<sup>3</sup> and Aaron Clauset<sup>1,2,4</sup>

<sup>1</sup>*Department of Computer Science, University of Colorado, Boulder, Colorado, USA*

<sup>2</sup>*BioFrontiers Institute, University of Colorado, Boulder, Colorado, USA*

<sup>3</sup>*Department of Ecology and Evolutionary Biology,  
University of Colorado, Boulder, Colorado, USA*

<sup>4</sup>*Santa Fe Institute, Santa Fe, New Mexico, USA*

Body size is a key physiological, ecological, and evolutionary characteristic of species. Within most major clades, body size distributions follow a right-skewed pattern where most species are relatively small while a few are orders of magnitude larger than the median size. Using a novel database of 742 extant and extinct primate species' sizes over the past 66 million years, we find that primates exhibit the opposite pattern: a left-skewed distribution. We investigate the long-term evolution of this distribution, first showing that the initial size radiation is consistent with plesiadapiformes (an extinct group with an uncertain ancestral relationship to primates) being ancestral to modern primates. We calculate the strength of Cope's Rule, showing an initial tendency for descendants to increase in size relative to ancestors until the trend reverses 40 million years ago. We explore when the primate size distribution becomes left-skewed and study correlations between body size patterns and climactic trends, showing that across Old and New World radiations the body size distribution initially exhibits a right-skewed pattern. Left-skewness emerged early in Old World primates in a manner consistent with a previously unidentified possible maximum body size, which may be mechanistically related to primates' encephalization and complex social groups.

## I. INTRODUCTION

Primates are a taxonomically and geographically diverse clade with hundreds of extant and extinct species found across South and Central America, Africa, and Asia, and with extinct species found in North America and Europe. Originating over 66 million years ago, primates exhibit a number of unusual behaviors, including complex, hierarchical social orders (Van Schaik 1996; Van Schaik and Van Hooff 1983), intergroup aggression and warfare (Manson et al. 1991; Mitani et al. 2010), tool-use in a variety of manners (Breuer et al. 2005; Ottoni and Izar 2008), and both arboreal and terrestrial lifestyles. They are perhaps best known for their relatively large brain size compared to their body size (Boddy et al. 2012; Shultz and Dunbar 2010), as measured by their encephalization quotient. This large brain size is believed to play a fundamental role in their complex social behavior. Extant primates tend to exhibit a high encephalization quotient, despite a broad distribution of body sizes across the clade, ranging from the pygmy mouse lemur (55 g) to the gorilla (130,000 g).

Here, we investigate the evolution of primate body sizes over the past 66 million years. We study how the body mass distribution of primate species varies across both time and changing ecological conditions, and how these patterns contrast with those of terrestrial mammals in general. We focus on body size as it is a fundamental variable for a species, is relatively easy to measure, and is comparable across extant and extinct species. Moreover, body size is closely related to many key ecological traits, including habitat, diet, geographical location, life span, population size (Brown 1995; Cardillo et al. 2005; Smith et al. 2002; West et al. 2002a), population growth (Savage et al. 2004), evolutionary fitness (Brown

et al. 1993), and extinction risk (Tomiya 2013), as well as physiological and evolutionary characteristics, such as metabolic rate (Gillooly et al. 2001; Kleiber 1947), DNA nucleotide substitution rate (Martin and Palumbi 1993), brain size (Kappelman 1996; Lande 1979; Martin and Harvey 1985), and skeletal measurements (Gingerich et al. 1982; Jungers 1985). This makes body size a convenient proxy variable (Lucas et al. 2008) that relates generally to important ecological, physiological, and evolutionary characteristics of species, and an ideal characteristic for a comparative focus within a given clade (Gittleman 1985). A deeper understanding of primate body size patterns will shed new light on the evolutionary history of this important clade, particularly relative to the concurrent expansion of terrestrial mammals and their sizes. The lens of species body distributions also provide a novel approach for characterizing the unusual evolutionary trajectory of primates, which produced high encephalization, sophisticated cognitive functions, complex social structures, and humans (Dunbar and Shultz 2007; Shultz and Dunbar 2007).

The extant and extinct body mass distributions of terrestrial mammals as a group, as well as those of subclades such as horses (Shoemaker and Clauset 2014) and whales (Clauset 2013), are known to exhibit a right-skewed pattern over multiple orders of magnitude, indicating relatively fewer large species than small species (Clauset and Erwin 2008; Kozłowski and Gawelczyk 2002; McShea 1994; Smith and Lyons 2011). This canonical pattern also appears in other major animal clades, including birds, fish, and insects (Kozłowski and Gawelczyk 2002). The shape of these distributions is a robust outcome from the interplay of macroecological and evolutionary processes under physiological constraints (Clauset and Erwin 2008). Within an evolv-

## II. METHODS

### A. Data Collection and Mass Estimation

ing clade, the body masses of its species follow a constrained, cladogenetic (branching) random-walk through time. The first constraint on the evolution of body size is a minimum viable body mass, which is dictated by thermoregulation, metabolic rate, and the clade's climatic conditions (West et al. 2002*b*). The maximum achievable species size is determined by a crossover point, when the risk of extinction, which grows with body size as a result of smaller population sizes and demographic stochasticity, exceeds the speciation rate (Clauset 2013). Between these minimum and maximum sizes, the right-skewed pattern is the outcome of an evolutionary trade off between the short-term advantages of increased size and the long-term risks of increased extinction rates for lineages within the clade. This pattern does not require a bias toward larger sizes within a lineage, as in Cope's rule (Alroy 1998), but may be enhanced by one.

However, it is unclear whether the right-skewed pattern occurs across all mammalian sub-clades, and whether the same underlying processes govern the evolution of body masses for primates, given their unique evolutionary trajectory, social structure, and unusual characteristics. Additionally, primates provide an unusual opportunity to study the evolution of body mass within a single clade, but across environmental conditions, as primates have two separate radiation events separated in time by 36 million years and in space between the Old and New Worlds. Old World primates originated approximately 66 mya in Asia (Beard 2004) while New World primates originated roughly 30 mya when small groups of primates arrived in the Americas. The temporal and spatial separation of these two radiation events of 36 million years and two distinct landmasses provides a natural experiment through which we may compare the radiation of a single clade under distinct climatic and ecological constraints, further illuminating the roles these variables can play in the evolution of body size.

Using a novel database of species-level primate body masses and first and last appearance estimates covering the past 66 million years, we study primate radiations, the overall evolution of primate body mass through time, and their relationship to environmental characteristics. We compare the evolution of primate body mass with that of terrestrial mammals to gain insight into the relationship between primate evolutionary history and the enclosing clade of all terrestrial mammals. We additionally investigate the relationship between primates and plesiadapiformes (an extinct order either closely related to primates or potentially the predecessor of primates (Silcox 2007)) by examining the body size dynamics within the initial radiation of primates with and without including plesiadapiformes as direct ancestors. We then explore how the evolution of primate body mass correlates with temperature and other environmental factors, such as the radiation of grasslands. Finally, we consider the generality of these insights through a direct comparison of size-related evolutionary patterns in the Old and New World primate radiations.

To study the distribution of primate body size and its evolution over time, we constructed a novel database consisting of 1024 primate and 86 plesiadapiform species belonging to 373 genera (Alroy et al. 2015; Beard 1987, 1988; Beard and Houde 1989; Bloch et al. 2002, 2001, 1998; Boubli and Ditchfield 2001; Bown 1982; Bown and Rose 1976, 1984, 1987, 1990, 1991; Burger 2007; Cameron 2004; Chopra 1978; Ciochon and Fleagle 1987; Covert and Williams 1991; Cuzzo 2008; Davidson 1987; Di Fiore et al. 2015; Eaton 1982, 1985; Emry 1990; Fleagle 2013; Fox 1984, 1990, 1991, 2002; Fox and Scott 2011; Fox et al. 2010; Frost et al. 2015, 2003; Gazin 1942, 1958, 1962, 1968, 1969, 1971; Gingerich 1975, 1976, 1989, 1993, 1995; Gingerich and Dorr Jr 1979; Gingerich and Haskin 1981; Gingerich et al. 1983; Gingerich and Simons 1977; Godinot and Mahboubi 1992; Gunnell 1985, 1989, 1992, 1995*a,b*, 1998, 2002; Gunnell and Gingerich 1981; Hartman 1986; Holroyd and Strait 2008; Honey 1990; Hunter et al. 1997; Hunter and Pearson 1996; Jones et al. 2009; Kelly and Whistler 1994; Kihm 1992, 1984; King et al. 1999; Kirk and Williams 2011; Krause 1978; Krause and Gingerich 1983; Krishtalka 1978; Krishtalka et al. 1975; Lillegraven 1980; MacPhee and Iturralde-Vinent 1995; Mason 1990; McGrew and Patterson 1962; McGrew and Sullivan 1971; McKenna 1960, 1990; Mootnick and Groves 2005; Muldoon and Gunnell 2002; Murphey and Dunn 2009; Qi et al. 2006; Rasmussen et al. 1995; Rasmussen 1996; Rasmussen and Nekaris 1998; Rigby 1980; Robinson 1968, 1994; Rose 1981, 1995; Rose et al. 1993; Rose and Bown 1982, 1991, 1996; Rose and Gingerich 1976; Rose et al. 1999; Schiebout 1974; Scott 2003; Scott and Redman 2016; Scott and Fox 2005; Shigehara et al. 2002; Silcox 2001; Simons 1961; Simpson 1935, 1936, 1937; Stirton 1951; Stirton and Savage 1949; Stock 1934; Storer 1990; Swindler 2002; Szalay 1969, 1976; Takai and Anaya 1996; Tejedor et al. 2008; Van Valen 1994; West 1973, 2015; Williams and Kirk 2008; Williams et al. 2007; Winterfeld 1982; Wood et al. 1979; Zinner et al. 2013; Zonneveld et al. 2000*a,b*). We included all primate and plesiadapiform species with published first and last appearance estimates or estimated body masses, yielding a total of 742 species with all three estimates (Table S1). These 742 species were used for all subsequent analyses.

A species list of extinct primates and plesiadapiformes was first constructed from the data recorded in Fossilworks (Alroy et al. 2015), an online and community-supported repository of fossil data. For each species, we recorded first and last appearances from primary literature or Fossilworks (Alroy et al. 2015). If no detailed first and last appearance estimates were available for a given species, we used the estimated epoch time periods (Fleagle 2013). Genus-level first and last appearance dates were not utilized unless only a single species in the genus is currently known.

205 We estimated species body mass using multiple meth-  
ods. When available, we included estimates of body  
masses from the primary literature. Following common  
body mass estimation methods (Gingerich et al. 1982),  
we additionally used allometric scaling to estimate body  
210 mass from dental measurements for the first, second,  
and third upper and lower molars in addition to the  
fourth upper and lower premolar, providing a total of  
16 possible measurements for each species. We recorded  
mesiodistal lengths, buccolingual widths, and for teeth  
215 without buccolingual measurements, we preferred anterior  
breadth measurements to posterior breadth. We also  
preferred trigon breadth to talon breadth measurements  
when available. We used allometric scaling to then estimate  
body mass from each dental measurement from a  
220 total of 16 models of the form  $\log(M) = \alpha \log(D) + \beta$   
where  $M$  is the estimated body mass in grams,  $D$  is the  
dental measurement for the particular model, and  $\alpha$  and  
 $\beta$  are the slope and intercept of the best fit (least squares)  
line through the transformed data. All models produced  
225  $R^2$  values between 0.73 and 0.91 (model details are included  
in Appendix S1). When multiple estimates were available,  
we averaged estimates from all applicable molar models  
and previous literature estimates to obtain a single species  
mass estimate.

230 All extant species with mass estimates from *Handbook  
of the Mammals of the World - Volume 3: Primates* (Zinner  
et al. 2013) or PanTHERIA (Jones et al. 2009) were  
included in our database, yielding mass data on 498 extant  
primate species. For extant species with unknown  
235 first appearance dates, we show first appearance dates as  
1 Ma for visualization purposes only. For both extinct  
and extant species, when multiple subspecies were listed,  
we averaged the mass of each sub-species to obtain a single  
species-level estimate. Similarly, we took the average  
240 mass when a minimum and maximum were included for  
a single species or when male and females masses were  
presented separately, yielding a single point estimate of  
body mass per species.

## B. Data Analysis

245 Dividing the past 70 million years into 5 million year  
bins, we calculated the mean, minimum, maximum, and  
skewness of the primate body size distribution in each bin  
as summary statistics. A bin size of 5 million years provides  
a balance between ensuring a sufficient number of  
250 points within each window, avoiding statistically anomalous  
changes in the summary statistics caused by small sample  
size, and sudden changes that are consequences of  
approximate first and last appearance dates and not evolutionary  
mechanisms. This approach is consistent with  
255 previous methods (Clauset and Erwin 2008; Clauset and  
Redner 2009; Shoemaker and Clauset 2014), and will facilitate  
a direct comparison across studies. To calculate these  
summary statistics, we include all species that existed  
in each time bin, regardless of their first and last

appearances. Thus, long-lived species or species that are  
present in multiple bins are included in all time bins that  
they overlap. The mean, minimum, and maximum body size  
provide summary estimates of how the body size distribution  
shifts through time, and facilitate a test of  
265 whether the extremes of the distribution follow a pattern  
similar to the central tendencies. Skewness is a measure  
of a distribution's asymmetry, and a positively skewed,  
or right-tailed, distribution exhibits relatively fewer very  
large species versus very small ones (Clauset and Erwin  
270 2008). To provide a comparison with terrestrial mammals  
as a whole, we calculated the skewness for the body sizes  
of North American mammals using data from 2008. Finally,  
we also calculated all four summary statistics for all extant  
primate species.

275 To estimate the average change in body mass between  
descendants and ancestors, we use Alroy's within-lineage  
definition of Cope's rule (Alroy 1998) to calculate the  
strength of Cope's rule for species in every 5 million year  
window and for extant species. To do so, we first defined  
280 each species in a given time bin as a descendant. We  
then selected, uniformly at random from the set of plausible  
ancestors, one species to assign as its ancestor. Plausible  
ancestors are defined as all species in the descendant's  
genus for whom the descendant's first appearance date  
falls on or between the ancestor's first and last appearance  
285 dates. If no such species within the genus is currently  
known, we instead assigned as the ancestor the species  
within the genus with the last appearance date closest to  
the first appearance date of the descendant. When a  
290 descendant species had no plausible ancestors and there  
was no within genus species with a last appearance date  
coming before the first appearance of the descendant,  
a plausible ancestor-descendant pair cannot be determined.  
In this case, the species was ignored when calculating  
295 the strength of Cope's rule. Once all ancestor-descendant  
pairs are determined, we calculate the pairwise change in  
sizes as  $\ln(M_d/M_a)$  where  $M_d$  is the mass of the  
descendant species and  $M_a$  is the mass of the ancestor.  
The average of this quantity over all descendant  
300 species and over 100 trials is a maximum likelihood  
estimator of the average strength of Cope's rule for that  
time bin (Alroy 1998). Following the same procedure  
for extant species provides an estimate of the strength of  
Cope's rule in the most recent time period.

305 We estimated "radiation cones," which represent the  
trajectory of the minimum and maximum species body  
masses during the initial radiation of a clade. This allowed  
us to compare both the size-range expansion rates of Old  
World versus New World primate radiations and  
310 the expansion rates of primates versus plesiadapiforms,  
which radiated 3 million years prior to the first known  
appearance of primates. These radiation cones begin with  
all known species at the beginning of the radiation (furthest  
date from present) and expand along the trajectories of  
315 the minimum and maximum body masses of the radiating  
clade. Calculated radiation cones measure time,  $t$ , as millions  
of years since 70 million years ago.

The radiation cone for plesiadapiformes is defined by the lines  $\log_{10}(M) = -0.09t + 2.15$  (minimum mass) and  $\log_{10}(M) = 0.15t + 1.84$  (maximum mass) spanning 66 to 55 mya. The radiation cone for Old World primates is defined by the lines  $\log_{10}(M) = -0.07t + 1.90$  (minimum mass) and  $\log_{10}(M) = 0.13t + 2.09$  (maximum mass) spanning 63.25 to 55 mya. Finally, the New World expansion of primates spans from 23 mya to present day and is bounded between  $\log_{10}(M) = -0.01t + 3.30$  (minimum mass) and  $\log_{10}(M) = 0.04t + 1.51$  (maximum mass).

Extinct and extant New World and Old World primate body size distributions are smoothed using a normally distributed kernel density smoother (Wasserman 2002). Climate conditions from 66 mya to present are used to compare body size changes through time to key climate changes. All climate data is from Zachos et al. (2001).

### III. RESULTS AND DISCUSSION

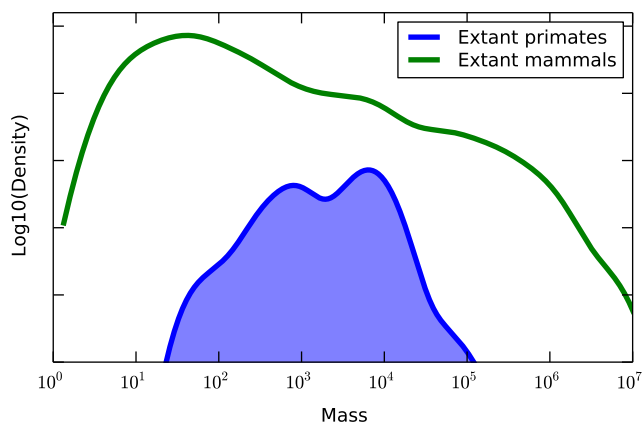

FIG. 1. Extant primate (blue online; dark grey print) and terrestrial mammal (green online; light grey print) body size distributions.

Across terrestrial mammals, birds, lizards, and mammalian subclades such as Equidae (horses) and cetaceans (whales, dolphins, and porpoises), extant body mass exhibits a canonical right-skewed distribution (Kozłowski and Gawelczyk 2002). Surprisingly, in contrast to this common pattern, we find that extant primates exhibit a left-skewed distribution of body sizes (skew =  $-0.27 \pm 0.11$ ) (Figure 1). That is, primates exhibit the opposite pattern relative to what is typical for mammals (Clauset and Erwin 2008), with relatively fewer small primates than large primates.

We further explore the evolution of the primate body size distribution and its origins to better understand the evolutionary pressures responsible for the left-skewed pattern exhibited by extant primates. As with other mammals, fossils from the Paleocene describing primate ancestors largely consist of teeth, small intact bones, and bone fragments (Fox and Scott 2011; Hunter and Pear-

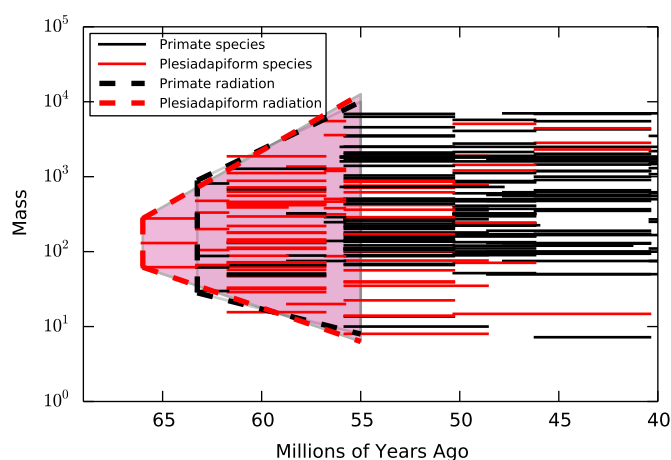

FIG. 2. Body sizes of primate (black) and plesiadapiform (red online; grey print) species at the initial radiation event. Solid lines are individual species and dashed lines depict radiation cones (see text) with (red online; grey print) and without plesiadapiformes (black).

son 1996; Silcox 2007), leaving out critical features used in trait-based phylogenies, e.g., post orbital bar, flattened nail on hallux (Wible and Covert 1987). However, as the fossil record and molecular phylogenies both improve, evidence increasingly supports defining Euprimates (also called true primates) as originating either in the very late Cretaceous or early Paleocene (65–62 Ma), closely matching our estimate of primate first appearance of 63.3 mya. Several species of early primates in the genus *Purgatorius* have been identified from Paleocene beds in Montana, USA and Saskatchewan, Canada (Fox and Scott 2011; Van Valen and Sloan 1965). However, diversity of *Purgatorius* species in these beds suggests that their radiation likely began in the late Cretaceous (Scott and Redman 2016). These species are now generally accepted as the likely earliest common ancestors of modern primates and are placed in the order plesiadapiformes (Bloch et al. 2007). Yet, plesiadapiformes are often treated as a paraphyletic clade excluding modern primates, although fossils discovered in recent decades show plesiadapiformes had many of the traits considered exclusive to Euprimates, e.g., grasping hallux with nail and petrosal bulla in skull (Bloch et al. 2007), indicating that they may be early common ancestors of primates.

Our analysis of early body size radiations further support the hypothesis that plesiadapiformes are early ancestors of primates. Our earliest first appearance dates collected for primates show four species (*Palenochtha weisae*, *Picrodus calgariensis*, *Edworthia lerbekmoei*, and *Torrejonia wilsoni*) originating 63.3 mya and characterized by body sizes spanning two orders of magnitude (Figure 2). This substantial size disparity suggests that the primate clade actually originated earlier in time. Obviously, it would be impossible for more than one species, let alone several species spanning multiple orders in body



size, to begin a new clade. One of these species could be the common ancestor of the others, though this is unlikely as it would require an extremely rapid divergence in species sizes within the newly radiating clade in order to match the empirically observed size range. However, the radiation cone of plesiadapiformes from 66 to 55 mya is similar to that of primates both in terms of the rates of size expansion (0.24 vs 0.20; Figure 2, difference in slopes of dashed lines) and the estimated initial founder body size (114 g vs 112 g) (Figure 2, dashed lines, extrapolated), providing support to the hypothesis that plesiadapiformes are likely early common ancestors of modern primates. In particular, the difference in the expansion rates of plesiadapiformes and primates may be interpreted as a percentage increase in body size per million years.

The strength of Cope's rule may also be interpreted as an average percent change in body size over time. Here, the rate difference, 0.04, falls well within a single standard deviation of our estimates for the strength of Cope's rule in the 60–55 mya and 55–50 mya windows ( $0.035 \pm 0.009$  and  $0.033 \pm 0.008$  respectively). This suggests that the observed rate difference is a product of noise as opposed to a true difference in the expansion rates of plesiadapiformes and primates. Additionally the three earliest plesiadapiformes (*Purgatorius titusi*, *Purgatorius unio*, and *Pandemonium dis*) exhibit intermediate body sizes between the minimum and maximum of the earliest primates, and span only a single order of magnitude, further supporting the notion that the group plesiadapiformes should be included within the Euprimates.

After origination, the size distribution of primates expands at both the upper and lower extremes from 66 to 55 mya, at which point it exhibits a minimum size of 8 g and a maximum size of 7000 g (Figure 3a,b). This range in body sizes represents the maximum disparity (nearly a factor of 900) observed over the past 66 million years. Both maximum and minimum primate size then remain relatively stable until the observed minimum body size increases to 50 g around 40 mya. However, the upper extreme of the distribution remains fairly stable, at 7000 g, until 23 mya, after which it again climbs over time to a maximum of 225,000 g (*Gigantopithecus blacki*) at 2.58 mya.

Notably, there is a pronounced fall in taxonomic diversity in our database from 23 to 28 mya, which coincides with the well known late Oligocene gap in the primate fossil record (Tavare et al. 2002). This gap occurs soon after the Grande Coupure extinction event and coincides with the beginning of New World primate radiation. However, our data suggest that this apparent decrease in primate diversity is an artifact of the fossil record. If the Oligocene primate fossil record gap represented a true primate extinction event, we would expect to observe both decreased taxonomic diversity and reduced size disparity immediately following the extinction event, and then possibly a steady expansion (likely at a similar rate as the original radiation) of one or the other

or both. Instead, immediately following the decrease, at the beginning of the Miocene, we observe both large taxonomic diversity and large mass disparity, spanning 2.5 orders of magnitude. Following this gap in the fossil record, the minimum size remains relatively stable until present day, while the maximum observed size increases slightly in both the Pliocene and Pleistocene.

Our database represents a relatively high and consistent sampling across time (Figure 3d), implying that trends in body sizes and diversity are likely not artifacts of variability in data coverage or sampling effort.

Environmental conditions and global temperatures are expected to be substantial sources of macroevolutionary pressures that, in turn, influence long-term patterns of body size across species (Angilletta et al. 2004). As such, changes in the environment can have considerable impact on the evolution and distribution of body sizes within a clade. For example, we may expect a decrease in temperature to correspond to an increase in average body size (Bergmann's rule (Bergmann 1848)), although many exceptions to this general trend exist and the trend is known to be plastic (Angilletta et al. 2004; Arendt 2011). Changes in measured delta oxygen 18 ( $\delta^{18}O$ ) levels, which represent the ratio of stable isotopes oxygen-18 and oxygen-16, and correspond to changes in global temperature (Zachos et al. 2001) over the past 66 million years (Figure 3c) indicate a reliable correlation between global temperatures and body size. Specifically, maximum and mean mass increase during the initial primate radiation, which corresponds to the increased temperature leading to the Paleocene-Eocene thermal maximum. Then, the maximum size remains constant while the minimum size increases as global temperatures decrease into the Oligocene. After the middle Miocene climate transition, there is an increase in maximum, mean, and minimum primate body size as global temperatures decrease. Although this correlation is consistent with what we might expect from Bergmann's rule, we emphasize that it is only a correlation. It remains unclear what mechanistic role, if any, global temperatures and thermoregulation might have played in these changes.

The expansion of grasslands during the Eocene also coincide with a large jump in the minimum size of primates, a period during which smaller arboreal primates become less common and primates begin using more open habitats and spending more time in terrestrial environments. A reduction in access to, and dependence upon, trees alters food abundance and availability, habitat range, and predator avoidance strategies in such a way that larger body sizes are expected to be advantageous. In comparison, an environment with little open space and relatively dense trees should tend to favor smaller, more arboreal species, whose weight and caloric needs are more easily supported by trees.

While transitions in primate minimum and maximum sizes occurred over relatively short time periods, changes in overall body size distributions occurred more gradually (Figure 4). Across primate evolution, body size

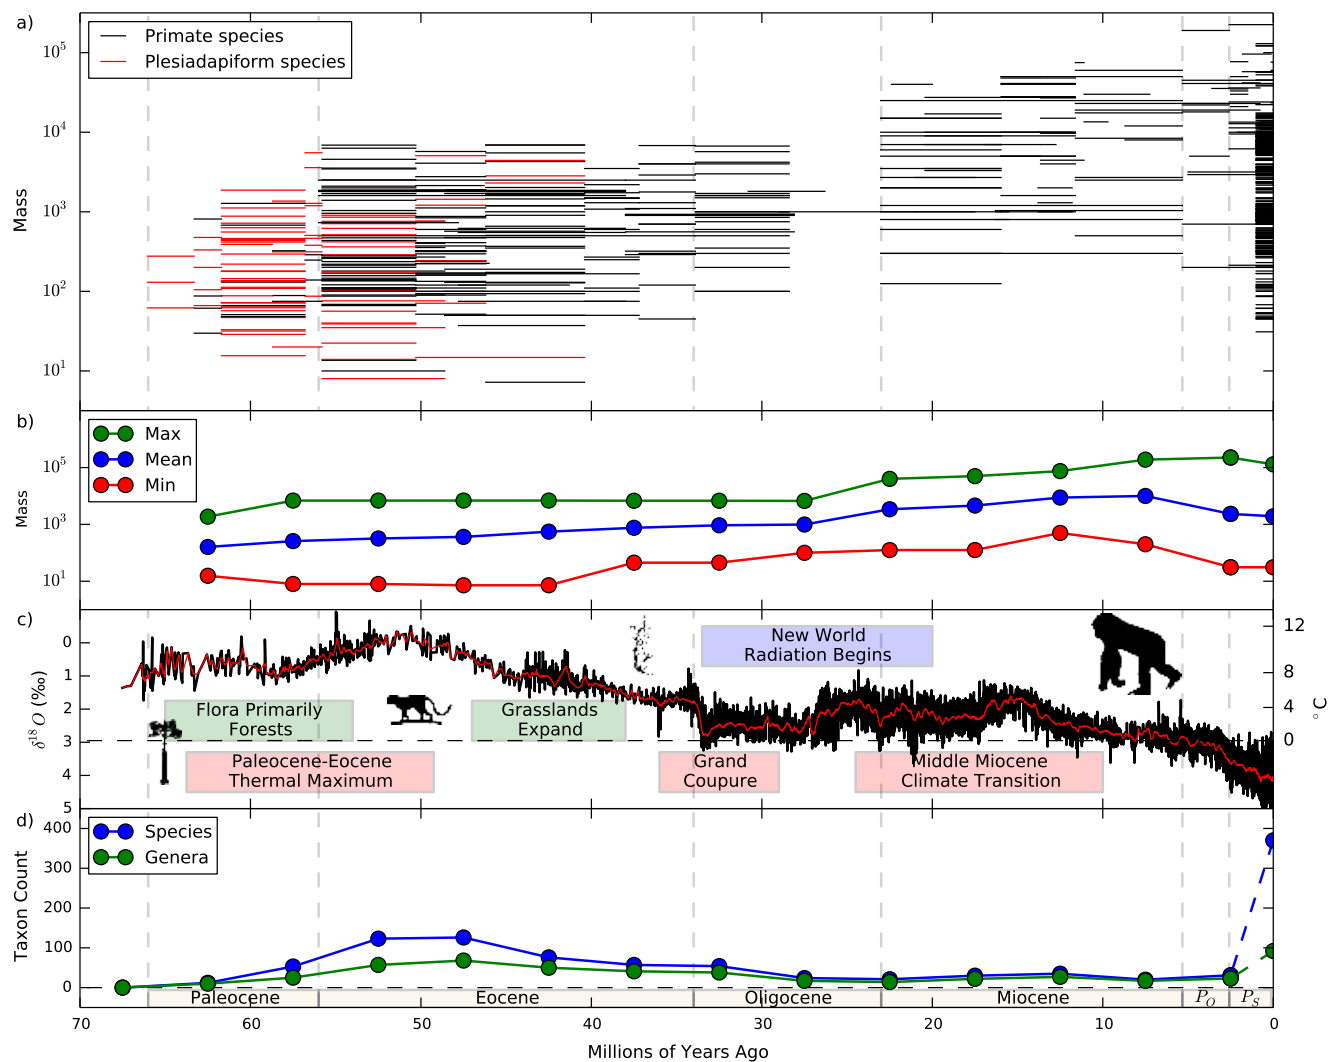

FIG. 3. The evolution of primate body sizes over 66 million years ( $P_O$  and  $P_S$  denote the Pliocene and Pleistocene, respectively). a) Body sizes of primate and plesiadapiform species, with each line spanning the first and last appearance of the given species. b) Minimum, mean, and maximum body sizes, at 5 million year intervals. c)  $\delta^{18}O$  measurements and corresponding global temperature estimates (data from (Zachos et al. 2001)), along with key ecological features. d) Empirical taxonomic diversity among primates, at both species and genus levels.

distributions gradually shift from right-skewed to left-skewed as the distribution evolves toward larger sizes, with increases in both the minimum and maximum sizes of primates. This shift is gradual through time (Figure 4 comparison of black lines representing the current distribution to overlaid grey shaded distributions from the previous 5 million year time slice), with an exception at 25 mya. During this time period, the primate body size distribution shifts rightward to larger sizes, corresponding to the increase in maximum size after the Grand Coupure species turnover in the fossil record.

When examining skewness in primate body size distributions using 5 million year snapshots, we see a gradual shift from a right-skewed distribution to the left-skewed

distribution observed in extant primates (Figure 1). At 65 mya, there is a clear right skew to the body size distribution with a skewness of  $0.20 \pm 0.28$  (Figure 5a). There are only gradual changes in the skewness of the distribution until 45 mya when the distribution skew becomes negative ( $-0.48 \pm 0.37$ ), and we observe a clear shift in the mean of the distribution to the right. This coincides with an increase in minimum body size. The left-skew trend in the distribution is robust through time from 45 mya to present (extant distribution skew  $-0.27 \pm 0.11$ ). The consistency in skewness after 45 mya suggests that the current left skew to the body size distribution is likely the result of internal gradual evolutionary changes and is not the result of recent anthropogenic extinction events

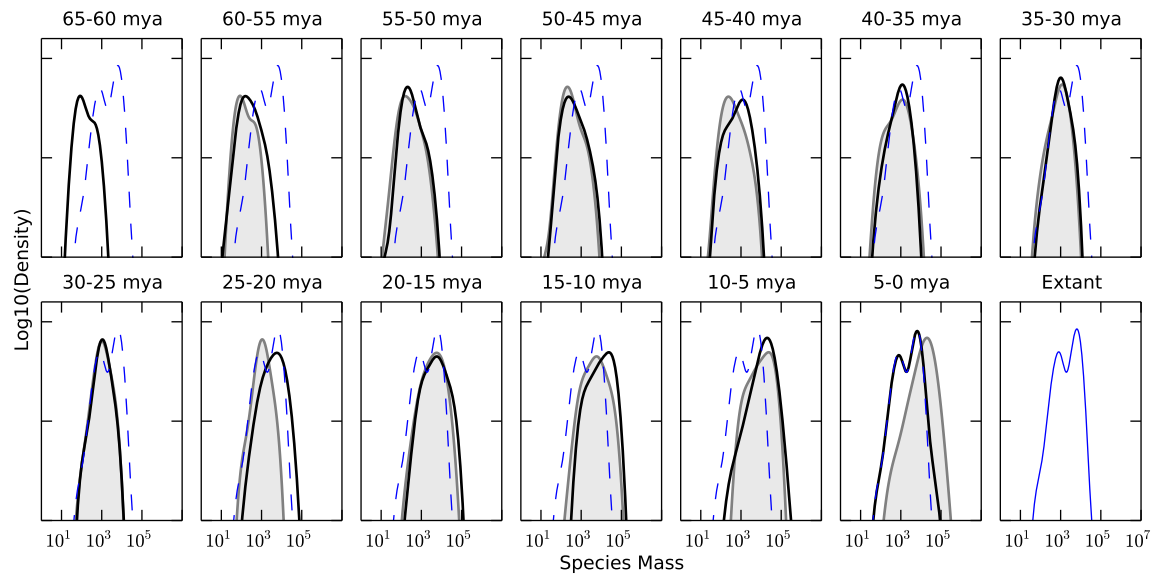

FIG. 4. Primate body size distributions in 5 million year increments, from 65 mya to present. Each snapshot shows the distribution of species sizes in that period (solid black), the distribution in the preceding period (gray fill), and the extant distribution (blue online; dashed grey print). Over time there are two clear patterns: first, the primate body size distribution shifts rightward, towards larger sizes, and second, it becomes increasing left skewed.

or external forcing caused by specific environmental or climactic changes. Additionally, it would be unlikely under a null independent and identically distributed model with 0 skewness to observe skewness below 0 over multiple draws, as we do from 45 mya to present. This pattern in skewness over time suggests that the left skew of primate body size distributions is not accidental, and is instead the outcome of specific evolutionary pressures that lead to most species being relatively close to the largest size, while a few species are much smaller.

The highly unusual evolution of primate body sizes is even more apparent when compared with patterns in body size distributions of terrestrial mammals in general (Figure 5a). The shift from positive to negative skewness for the primate distribution occurs 55 mya, falling well below the 0 skewness line 45 mya when the skewness becomes  $-0.48 \pm 0.37$  and remaining negative until present day. In contrast, the body size distribution of North American mammals is right skewed throughout time and highly right skewed from 55 to 15 mya. It is worthwhile to point out that the skewnesses of these two distributions are close 65 mya but diverge thereafter for 35 Ma. From 30 Ma onward, the distribution of North American mammals exhibits progressively less right-skewness, a trend whose beginning coincides with the Grande Coupure event, when global temperatures began to cool.

Variation in the skewness of body size distributions can be understood as the outcome of several macroevolutionary processes and constraints (Clauset et al. 2009), including Cope's rule (Alroy 1998; Clauset and Redner 2009). For instance, cladogenetic variation in species

sizes, in the context of increased extinction risk for large species and a physiological minimum size, has been shown to explain the right-skewed body size distribution (Clauset and Redner 2009) of terrestrial mammals. When descendant species are, on average, larger than their ancestor species (Cope's rule), the right skewness created by the above processes will be enhanced (Alroy 1998). In contrast, if descendant species are, on average, smaller than their ancestor species (a negative value for the strength of Cope's rule), the right skewness the above processes create will be reduced and possibly even converted into a left-skew distribution. Similarly, cladogenetic size variation in the presence of a maximum possible size and an extinction risk that increases as size decreases would naturally produce left-skewed size distributions, with Cope's rule enhancing or mitigating that skewness depending on its direction, positive or negative. Examining the average strength of Cope's rule over time for primates (Figure 5b), we observe an initial positive strength, which is concordant with most empirical investigations of Cope's rule across clades and time. However, this measure of the average relative change in size from ancestor to descendent reverses sign at 47 mya, indicating that new primate species are typically smaller than their ancestors. This pattern remains consistent to present day.

This change in the direction of Cope's rule could partially explain the left skewness observed in relatively recent and extant primate body size distributions, particularly if the extinction risk of primate species grew very weakly or not at all with increased size. However, if Cope's rule alone fully accounted for the emergence of

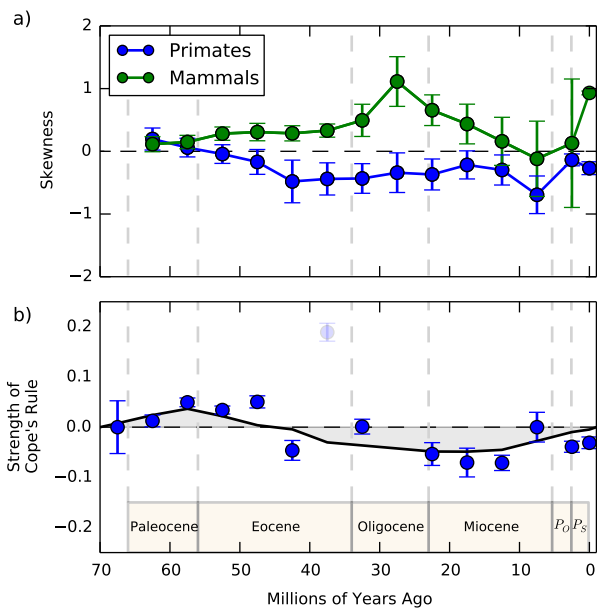

FIG. 5. a) Body size distribution skewness, for primates (blue online; dark grey print) and North American terrestrial mammals (green online; light grey print) over 66 million years, in 5 million year increments. b) Strength of Cope's rule for primates both in 5 million year increments (see text) and as a smoothed trend, representing the average of the four nearest estimates. (The estimate at 37.5 mya was omitted from the trend line calculation because it is based on only three ancestor-descendent pairs.)

the left skew, we would expect the sign of the skewness to follow that of Cope's rule after some delay or lag period. Instead, we observe the opposite pattern, in which the sign change in Cope's rule follows the sign change in skewness, after a delay of 5 million years. This suggests that changes in the mechanisms governing the relative size of descendants to ancestors is not the primary cause of the unusual left-skew pattern among primates.

Instead, the observed pattern suggests the existence of a maximum body size for primates, around 230,000 g, which induces a left skew as the distribution presses up against the maximum. Just as a right-skewed distribution is the natural result of cladogenetic size variation in the presence of a hard minimum size and a slight correlation between extinction risk and body size (Clauset and Redner 2009; Shoemaker and Clauset 2014), a left skew would be a natural result of a hard upper bound on viable species size with an inverse or no relationship between size and extinction risk. In these circumstances, species are prevented from evolving past the maximum limit. The lower limit for terrestrial mammals is well understood to be due to thermoregulation constraints (Pearson 1948), which are unlikely to be the origin of a maximum size constraint.

We speculate that the maximum is related to an inability to meet the energetic and developmental needs

of larger bodied but still highly encephalized, socially complex primates. Large brain size places greater energetic demands on individuals (Leonard et al. 2003), and the group social structure common among primates is well-established to be a function of brain size, specifically neocortical volume (Dunbar 1992). Maximum size would then be limited by the caloric intake necessary to maintain brain size and group structure, as diet quality decreases relative to body size in primates (Leonard and Robertson 1994). Indeed, a study of the diet of *Gigantopithecus*, an extinct primate genus (first appearance 5.33 mya and a final appearance in the fossil record 11,700 years ago) containing the two largest primate species observed (*Gigantopithecus blacki* at 225,000 g and *Gigantopithecus bilaspurensis* at 190,000 g), suggests a dietary range insufficient to support its caloric needs through the climatic changes known to have affected its habitat (Bocherens et al. 2015). Thus, its large size and correspondingly large caloric requirements are hypothesized to have played a key role in its extinction (Bocherens et al. 2015). Furthermore, while all mammals exhibit decreased litter size and increased developmental time with increasing body size, these relationships are more severe for primates (Charnov and Berrigan 1993). Because primates have high encephalization coefficients, their offspring require longer developmental times compared to mammals more generally, limiting the number of offspring produced in a female's lifetime. These constraints support our conjecture of a maximum size for primates, as larger species produce fewer offspring and have decreased diet quality, but still require enough energy to maintain high encephalization quotients and socially complex societies.

From the beginning of the Eocene to the end of the Oligocene, the size of the largest observed primate species is relatively stable, around 7000 g, well below the largest size of any extant primate (Figure 3a,b). This pattern suggests a transient maximum size for early primates, and it aligns well in time with the initial shift towards left skewness of the body size distribution and the beginning of New World primate radiation. Notably, soon after this initial maximum is reached, the clade's size distribution begins exhibiting a negative skew. Such a lag is consistent with an initially right-skew distribution that encounters and then presses slowly up against a maximum limit. The subsequent release in the early Miocene of this transient limit is followed by a continued shift upward toward larger sizes, until, we speculate, a second maximum size limit is encountered, around 230,000 g, in the mid-to-late Miocene. Throughout this period, the left-skew pattern continues, which suggests that the macroevolutionary forces that first created the left-skew pattern continued to shape the sizes of primates in this period.

During this time, the primate clade experienced a second radiation, this time in the New World. This event provides an unusual opportunity, in the form of a natural experiment, to investigate the relative contributions



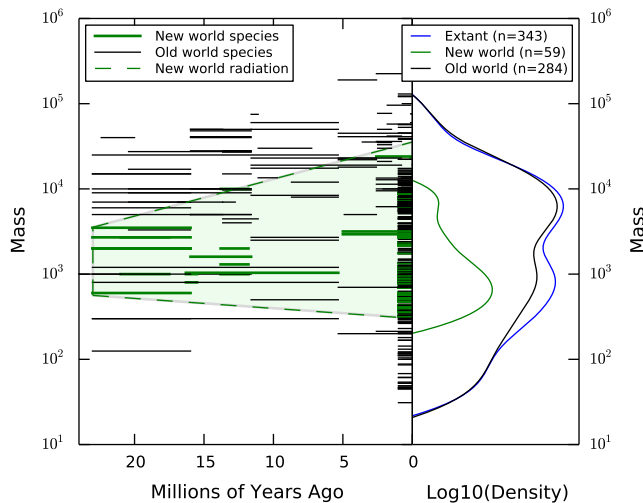

FIG. 6. Left) Body sizes of all primate species from the first appearance of New World primate species to present, including a radiation cone (light green online; dashed grey print) for New World primates (green online; grey print) in comparison to all Old World species (black). Right) Smoothed extant body size distributions for all primates (blue online; dark grey print), New World primates (green online; light grey print), and Old World primates (black), illustrating the right-skewed pattern among New World species and the left-skewed pattern among Old World species.

685 of external forcing events, such as climate change, from international evolutionary patterns, such as Cope's rule in the evolution of body size and aggregate body size distributions. While Old World primates originated 66 mya, New World primates originated approximately 27 to 31  
690 mya (Perez et al. 2013), providing two distinct radiation events within a single clade separated by time, location, and environmental conditions.

The rafting hypothesis is the leading explanation of the appearance of primates in the New World (De Oliveira et al. 2009). This method of travel would have a major impact on the initial size distribution of New World primates. In particular, rafting on small land or vegetative masses from the Old to New World would likely exclude many large primates from making the journey, biasing the initial distribution of New World primates towards the small end, which Figure 6 corroborates. From our dataset, the founder species for the New World radiation are indeed estimated to be between 600 and 3500 g, half as large as the maximum size observed in the Old World  
705 prior to 23 mya. Hind-casting using a radiation cone fitted to our database places the first appearance of New World primates at approximately 30 mya followed by a gradual increase in the maximum size of the distribution and a slower expansion towards smaller sizes.

710 Independent phylogenetic and morphological analyses support the tracing of New World platyrrhine primate ancestry to one or several rafting events from the African

continent in the late Eocene or early Oligocene (Kay et al. 2004). Stem platyrrhines in South America, groups that  
715 branched off before the last common ancestor of modern platyrrhine primates, are geographically divided into three groups (Kay 2015). Of these, stem platyrrhines found in the mid-latitudes represent the most ancient group, with *Branisella boliviana* dating back some 26  
720 mya in what is now modern Bolivia (Takai and Anaya 1996). A second mainland stem clade of at least seven genera was found in higher latitudes, in areas of modern Chile and Argentina (between 34° and 52°S) between 21 mya and 16.5 mya (Kay 2015). The final stem clade,  
725 younger than the likely crown platyrrhine clade, is associated with the Greater Antilles on the islands of Cuba, Hispanola, and Jamaica from 18 mya and likely survived there until human occupation (MacPhee and Iturralde-Vinent 1995). Scant fossil evidence of species that may  
730 be part crown platyrrhines make identifying the exact origins of the clade difficult for both timing and location. However, fossil phylogenetic and molecular clock evidence both support origination at 20–24 mya (Hodgson et al. 2009; Kay 2015). Recently discovered fossil  
735 evidence from Panama indicates primates of the family Cebidae arrived by rafting from South America at 20.9 mya and therefore family-level diversification of extant platyrrhine families between 22 and 25 mya (Bloch et al. 2016).

740 After the initial founding event, the New World primate body size distribution expanded rapidly, with the maximum size increasing at a faster rate than the minimum size. The size disparity among New World primates shows no evidence of slowing, and we observe no evidence  
745 that the largest New World primates are close to the hypothesized maximum size observed in Old World primates. The extant distribution of body sizes for New World primates is also right skewed, similar to most other clades, including terrestrial mammals (Clauset and Erwin 2008), Equidae (Shoemaker and Clauset 2014), Cetacea Clauset (2013), and Old World primates 60 mya (Figure 6). The evolution of the Old and New World species body size distributions appear to have followed similar trajectories (comparing Old World from 66 mya to 45 mya and New World from 20 mya to present), with expansions of both maximum and minimum size as well as right-skewed distributions. One difference, however, is the length of expansion: the initial Old World primate radiation lasted approximately 10 million years while the  
750 New World primates expanded for 20 million years.

This contrast may be due to environmental differences, specifically the relative amount of grasslands versus tropical forests. The time period following the initial radiation of Old World primates is typified by high temperatures, tropical climates, and forests. Though considerable cooling took place during the Eocene, major losses of subtropical forests did not occur until near the Eocene-Oligocene boundary. Old World primates living during the Eocene therefore would have had habitats comprised primarily of forests with few open grasslands. Such ubiq-  
770

uity of trees suggests that a majority of primates would have led arboreal lives and would have been constrained in size by this lifestyle. In comparison, the time period surrounding the initial radiation of New World primates 775 is marked by a slight increase in temperature and a small resurgence in subtropical forests followed by further temperature decreases and expanding grasslands. With more open space, advantages of larger body sizes would be pronounced. It is likely that this difference in environments 780 resulted in a considerably smaller upper bound for Old World primates between 66 and 45 mya compared to New World primates.

The congruence of the pattern of expansion across these two primate radiations, despite the many environmental differences, suggests a common endogenous 785 macroevolutionary process. Environmental variables appear to have only altered the length of primate radiations between the two and the transient maximum size for Old World primates. We speculate that were the New World 790 radiation to continue, the size distribution would eventually become left skewed, like the Old World primates, as a result of pressing up against the social-complexity maximum size described above.

#### IV. CONCLUSION

Investigating the evolutionary mechanisms that shape 795 the distribution of species body sizes helps facilitate a deeper and more theoretically complete understanding of evolutionary dynamics. Body size distributions, particularly when studied over time, can also shed new light 800 on the key factors that constrain and drive species sizes and on how related phenotypic traits coevolve with body size. Ultimately, understanding the evolutionary dynamics of species body sizes is a key part of developing more realistic evolutionary models.

After constructing a novel database of 742 primate 805 species over the past 66 million years, we show that primates are not only unusual in their encephalization quotient, social structure, and ability to use tools, but also in the evolution of their body sizes. Unlike extant terrestrial mammals, birds, and lizards, as well as mammalian 810 sub-clades like Equidae and Cetacea, which all exhibit a canonical right-skewed body size distribution, extant primate body sizes are left-skewed. This left skew is a robust pattern over the past 40 million years, and appeared only 815 after a period of right-skewness that persisted throughout, and shortly after, the initial radiation. This highly unusual pattern can be understood as the natural outcome of a distribution first evolving up to and against a maximum size limit. This pattern is enhanced by a second unusual pattern: the tendency for descendant species 820 to be smaller than their ancestors, which is the opposite

of the more ubiquitous pattern of Cope's rule, where descendants are typically larger than their ancestors.

These findings suggest that additional work is needed 825 both to articulate evolutionary models of species body sizes (Clauset and Erwin 2008) that incorporate a maximum size parameter Gherardi et al. (2013), and models that can allow the directionality of Cope's rule to change. The latter is particularly interesting, as the strength and 830 direction of Cope's rule is typically assumed to be fixed across evolutionary time and all members of a clade when modeling body size evolution.

Further, we showed how studies of body size distributions can elucidate taxonomic patterns, by comparing 835 primate radiation with and without plesiadapiformes and diversity in body size after the gap in the fossil record during the Grand Coupure. By comparing New and Old World radiation events, we show that primate body size distributions initially mirror those of terrestrial mammals 840 more generally and follow similar radiation patterns, suggesting internal consistency in the evolution of body size that can be modified by environmental factors. For primates, climate and the extent and prevalence of grasslands may have played a large role in shaping the speed 845 of primate radiations and a maximum size through time. Investigating the precise mechanism by which these environmental factors shaped the distribution's evolution would be valuable line of future work, and would shed new light on how broad-scale ecological processes shape the selective forces that drive clade-level body size dynamics.

Finally, our empirical findings support the belief that a relatively hard maximum species body size exists for primates, which we speculate is caused by the complex social structure of large primates, the large brains required 855 for this lifestyle, and the lack of available energy from food to support larger brains. Circumstantial evidence from other studies suggests this mechanism is plausible, but further research is needed to determine its veracity. 860 We look forward both to future investigations of primate body size evolution and its relationship to the many unusual characteristics of primates, and new body size evolution models that can better capture the full variability of body size distributions observed among animals.

#### V. ACKNOWLEDGEMENTS

RCT was supported during this work by the University of Colorado's Interdisciplinary Quantitative Biology program and NSF IGERT 1144807. LGS was supported by an NSF GRFP. We thank the University of Colorado's 870 Quantitative Think Tank for valuable discussions about the analyses.

- 875 Alroy, J. (2008), 'North American fossil mammal systematics database (2008). Paleobiology database online systematics archive 3', <http://paleodb.org/>.
- Alroy, J. et al. (2015), 'Taxonomic occurrences of primates and plesiadapiformes recorded in the Paleobiology Database. Fossilworks', <http://fossilworks.org/>.
- 880 Angilletta, M. J., Steury, T. D. and Sears, M. W. (2004), 'Temperature, growth rate, and body size in ectotherms: Fitting pieces of a life-history puzzle', *Integrative and Comparative Biology* **44**(6), 498–509.
- 885 Arendt, J. D. (2011), 'Size-fecundity relationships, growth trajectories, and the temperature-size rule for ectotherms', *Evolution* **65**(1), 43–51.
- Beard, C. (2004), *The hunt for the dawn monkey: Unearthing the origins of monkeys, apes, and humans*, Univ of California Press.
- 890 Beard, K. C. (1987), 'Jemezian, a new omomyid primate from the early Eocene of northwestern New Mexico', *Journal of Human Evolution* **16**(6), 457–468.
- Beard, K. C. (1988), 'New notharctine primate fossils from the early Eocene of New Mexico and southern Wyoming and the phylogeny of Notharctinae', *American Journal of Physical Anthropology* **75**(4), 439–469.
- 895 Beard, K. C. and Houde, P. (1989), 'An unusual assemblage of diminutive plesiadapiforms (Mammalia,? Primates) from the early Eocene of the Clark's Fork Basin, Wyoming', *Journal of Vertebrate Paleontology* **9**(4), 388–399.
- 900 Bergmann, C. (1848), *Über die Verhältnisse der Wärmeökonomie der Thiere zu ihrer Grösse*, Vandenhoeck und Ruprecht.
- 905 Bloch, J. I., Boyer, D. M., Gingerich, P. D. and Gunnell, G. F. (2002), 'New primitive paromomyid from the Clarkforkian of Wyoming and dental eruption in Plesiadapiformes', *Journal of Vertebrate Paleontology* **22**(2), 366–379.
- 910 Bloch, J. I., Fisher, D. C., Rose, K. D. and Gingerich, P. D. (2001), 'Stratocladistic analysis of Paleocene Carpolestidae (Mammalia, Plesiadapiformes) with description of a new late Tiffanian genus', *Journal of Vertebrate Paleontology* **21**(1), 119–131.
- 915 Bloch, J. I., Rose, K. D. and Gingerich, P. D. (1998), 'New species of Batodonoides (Lipotyphla, Geolabididae) from the early Eocene of Wyoming: Smallest known mammal?', *Journal of Mammalogy* **79**(3), 804–827.
- 920 Bloch, J. I., Silcox, M. T., Boyer, D. M. and Sargis, E. J. (2007), 'New Paleocene skeletons and the relationship of plesiadapiforms to crown-clade primates', *Proceedings of the National Academy of Sciences* **104**(4), 1159–1164.
- 925 Bloch, J. I., Woodruff, E. D., Wood, A. R., Rincon, A. F., Harrington, A. R., Morgan, G. S., Foster, D. A., Montes, C., Jaramillo, C. A., Jud, N. A., Jones, D. S. and MacFadden, B. J. (2016), 'First North American fossil monkey and early Miocene tropical biotic interchange', *Nature* **533**(7602), 243–246.
- 930 Bocherens, H., Schrenk, F., Chaimanee, Y., Kullmer, O., Mörike, D., Pushkina, D. and Jaeger, J.-J. (2015), 'Flexibility of diet and habitat in Pleistocene South Asian mammals: Implications for the fate of the giant fossil ape Gigantopithecus', *Quaternary International*.
- 935 Boddy, A. M., McGowen, M. R., Sherwood, C. C., Grossman, L. I., Goodman, M. and Wildman, D. E. (2012), 'Comparative analysis of encephalization in mammals reveals relaxed constraints on anthropoid primate and cetacean brain scaling', *Journal of Evolutionary Biology* **25**(5), 981–994.
- 940 Boubli, J. P. and Ditchfield, A. D. (2001), 'The time of divergence between the two species of uacari monkeys: *Cacajao calvus* and *Cacajao melanocephalus*', *Folia Primatologica* **71**(6), 387–391.
- Bown, T. M. (1982), *Geology, paleontology, and correlation of Eocene volcanoclastic rocks, southeast Absaroka range, Hot Springs County, Wyoming*, US Government Printing Office.
- 945 Bown, T. M. and Rose, K. D. (1976), 'New early Tertiary primates and a reappraisal of some Plesiadapiformes', *Folia Primatologica* **26**(2), 109–138.
- 950 Bown, T. M. and Rose, K. D. (1984), 'Reassessment of some early Eocene Omomyidae, with description of a new genus and three new species', *Folia Primatologica* **43**(2-3), 97–112.
- 955 Bown, T. M. and Rose, K. D. (1987), 'Patterns of dental evolution in early Eocene anaptomorphine primates (Omomyidae) from the Bighorn Basin, Wyoming', *Memoir (The Paleontological Society)* pp. 1–162.
- 960 Bown, T. M. and Rose, K. D. (1990), *Dawn of the age of mammals in the northern part of the Rocky Mountain interior, North America*, Vol. 243, Geological Society of America.
- 965 Bown, T. M. and Rose, K. D. (1991), 'Evolutionary relationships of a new genus and three new species of omomyid primates (Willwood Formation, lower Eocene, Bighorn Basin, Wyoming)', *Journal of Human Evolution* **20**(6), 465–480.
- Breuer, T., Ndoundou-Hockemba, M. and Fishlock, V. (2005), 'First observation of tool use in wild gorillas', *PLoS Biology* **3**(11), e380.
- 970 Brown, J. H. (1995), *Macroecology*, University of Chicago Press, Chicago.
- 975 Brown, J. H., Marquet, P. A. and Taper, M. L. (1993), 'Evolution of body size: Consequences of an energetic definition of fitness', *American Naturalist* **142**(4), 573–584.
- 980 Burger, B. J. (2007), 'A new late Paleocene vertebrate fauna from the Ohio Creek Formation of western Colorado', *The Mountain Geologist* **44**(3), 141–150.
- 985 Cameron, D. W. (2004), *Hominid adaptations and extinctions*, UNSW Press.
- 990 Cardillo, M., Mace, G. M., Jones, K. E., Bielby, J., Bininda-Emonds, O. R. P., Sechrest, W., Orme, C. D. L. and Purvis, A. (2005), 'Multiple causes of high extinction risk in large mammal species', *Science* **309**, 1239–1241.
- 995 Charnov, E. L. and Berrigan, D. (1993), 'Why do female primates have such long lifespans and so few babies? Or life in the slow lane', *Evolutionary Anthropology: Issues, News, and Reviews* **1**(6), 191–194.
- Chopra, S. R. K. (1978), 'New fossil evidence on the evolution of Hominoidea in the Sivaliks and its bearing on the problem of the evolution of early man in India', *Journal of Human Evolution* **7**(1), 3–9.
- Ciochon, R. L. and Fleagle, J. G. (1987), *Primate evolution and human origins*, Transaction Publishers.
- 1000 Clauset, A. (2013), 'How large should whales be?', *PloS one* **8**(1), e53967.



- Clauset, A. and Erwin, D. H. (2008), 'The evolution and distribution of species body size', *Science* **321**, 399–401.
- Clauset, A. and Redner, S. (2009), 'Evolutionary model of species body mass diversification', *Physical Review Letters* **102**, 038103.
- Clauset, A., Schwab, D. J. and Redner, S. (2009), 'How many species have mass  $m$ ?', *American Naturalist* **173**(2), 256–263.
- Covert, H. H. and Williams, B. A. (1991), 'The anterior lower dentition of *Washakius insignis* and adapid-anthropoidean affinities', *Journal of Human Evolution* **21**(6), 463–467.
- Cuozzo, F. P. (2008), 'Using extant patterns of dental variation to identify species in the primate fossil record: a case study of middle Eocene *Omomys* from the Bridger Basin, southwestern Wyoming', *Primates* **49**(2), 101–115.
- Davidson, J. R. (1987), 'Geology and mammalian paleontology of the Wind River Formation, Laramie Basin, southeastern Wyoming', *Rocky Mountain Geology* **25**(2), 103–132.
- De Oliveira, F. B., Molina, E. C. and Marroig, G. (2009), Paleogeography of the South Atlantic: A route for primates and rodents into the New World?, in 'South American primates', Springer, pp. 55–68.
- Di Fiore, A., Chaves, P. B., Cornejo, F. M., Schmitt, C. A., Shanee, S., Cortes-Ortiz, L., Fagundes, V., Roos, C. and Pacheco, V. (2015), 'The rise and fall of a genus: Complete mtDNA genomes shed light on the phylogenetic position of yellow-tailed woolly monkeys, *Lagothrix flavicauda*, and on the evolutionary history of the family Atelidae (Primates: Platyrrhini)', *Molecular Phylogenetics and Evolution* **82**, 495–510.
- Dunbar, R. I. M. (1992), 'Neocortex size as a constraint on group size in primates', *Journal of Human Evolution* **22**(6), 469–493.
- Dunbar, R. I. M. and Shultz, S. (2007), 'Understanding primate brain evolution', *Philosophical Transactions of the Royal Society of London B: Biological Sciences* **362**(1480), 649–658.
- Eaton, J. G. (1982), 'Paleontology and correlation of Eocene volcanic rocks in the Carter Mountain area, Park County, southeastern Absaroka Range, Wyoming', *Rocky Mountain Geology* **21**(2), 153–194.
- Eaton, J. G. (1985), 'Paleontology and correlation of the Eocene Tepee Trail and Wiggins formations in the north fork of Owl Creek area, southeastern Absaroka Range, Hot Springs County, Wyoming', *Journal of Vertebrate Paleontology* **5**(4), 345–370.
- Emry, R. J. (1990), 'Mammals of the Bridgerian (middle Eocene) Elderberry Canyon local fauna of eastern Nevada', *Geological Society of America Special Papers* **243**, 187–210.
- Fleagle, J. G. (2013), *Primate adaptation and evolution*, Academic Press.
- Fox, R. C. (1984), 'A new species of the Paleocene primate *Elphidotarsius* Gidley: Its stratigraphic position and evolutionary relationships', *Canadian Journal of Earth Sciences* **21**(11), 1268–1277.
- Fox, R. C. (1990), 'Pronothodectes *gaoi* n. sp. from the late Paleocene of Alberta, Canada, and the early evolution of the Plesiadapidae (Mammalia, Primates)', *Journal of Paleontology* **64**(04), 637–647.
- Fox, R. C. (1991), 'Saxonella (Plesiadapiformes?: Primates) in North America: *S. naylori*, sp. nov., from the late Paleocene of Alberta, Canada', *Journal of Vertebrate Paleontology* **11**(3), 334–349.
- Fox, R. C. (2002), 'The dentition and relationships of *Carpodectes Cygneus* (Russell) (Carpolestidae, Plesiadapiformes, Mammalia), from the late Paleocene of Alberta, Canada', *Journal of Paleontology* **76**(5), 864–881.
- Fox, R. C. and Scott, C. S. (2011), 'A new, early Puercan (earliest Paleocene) species of *Purgatorius* (Plesiadapiformes, Primates) from Saskatchewan, Canada', *Journal of Paleontology* **85**(3), 537–548.
- Fox, R. C., Scott, C. S. and Rankin, B. D. (2010), '*Edworthia lerbekmoi*, a new primitive paromomyid primate from the Torrejonian (early Paleocene) of Alberta, Canada', *Journal of Paleontology* **84**(05), 868–878.
- Frost, S. R., Gilbert, C. C., Pugh, K. D., Guthrie, E. H. and Delson, E. (2015), 'The hand of *Cercopithecoides williamsi* (Mammalia, Primates): Earliest evidence for thumb reduction among colobine monkeys', *PloS One* **10**(5), e0125030.
- Frost, S. R., Plummer, T., Bishop, L. C., Ditchfield, P., Ferraro, J. and Hicks, J. (2003), 'Partial cranium of *Cercopithecoides kimeui* Leakey, 1982 from Rawi Gully, southwestern Kenya', *American Journal of Physical Anthropology* **122**(3), 191–199.
- Gazin, C. L. (1942), 'Fossil mammalia from the Almy formation in western Wyoming', *Journal of the Washington Academy of Sciences* **32**(7), 217–220.
- Gazin, C. L. (1958), *A review of the middle and upper Eocene primates of North America (with 14 plates)*, Vol. 136, Smithsonian Institution.
- Gazin, C. L. (1962), *A further study of the lower Eocene mammalian faunas of southwestern Wyoming*, Vol. 144, Smithsonian Institution.
- Gazin, C. L. (1968), 'A new primate from the Torrejon middle Paleocene of the San Juan Basin, New Mexico', *Proceedings of the Biological Society of Washington* **81**, 629–34.
- Gazin, C. L. (1969), *A new occurrence of Paleocene mammals in the Evanston Formation, southwestern Wyoming*, Smithsonian Institution Press.
- Gazin, C. L. (1971), 'Paleocene primates from the Shotgun Member of the Fort Union Formation in the Wind River Basin, Wyoming', *Proceedings of the Biological Society of Washington* **84**(3), 13–38.
- Gherardi, M., Mandrà, S., Bassetti, B. and Lagomarsino, M. C. (2013), 'Evidence for soft bounds in ubuntu package sizes and mammalian body masses', *Proceedings of the National Academy of Sciences* **110**(52), 21054–21058.
- Gillooly, J. F., Brown, J. H., West, G. B., Savage, V. M. and Charnov, E. L. (2001), 'Effects of size and temperature on metabolic rate', *Science* **293**(5538), 2248–2251.
- Gingerich, P. D. (1975), *New North American Plesiadapidae (Mammalia, Primates) and a biostratigraphic zonation of the middle and upper Paleocene*, Museum of Paleontology, University of Michigan.
- Gingerich, P. D. (1976), *Cranial anatomy and evolution of early Tertiary Plesiadapidae (Mammalia, Primates)*, number 15, Museum of Paleontology, University of Michigan.



- Gingerich, P. D. (1989), New earliest Wasatchian mammalian fauna from the Eocene of northwestern Wyoming: Composition and diversity in a rarely sampled high-floodplain assemblage, Technical report, Museum of Paleontology, University of Michigan.
- Gingerich, P. D. (1993), Early Eocene *Teilhardina brandtii*: Oldest omomyid primate from North America, Technical report, Museum of Paleontology, the University of Michigan.
- Gingerich, P. D. (1995), Sexual dimorphism in earliest Eocene *Cantius torresi* (Mammalia, Primates, Adapoidea), Technical report, Museum of Paleontology, University of Michigan.
- Gingerich, P. D. and Dorr Jr, J. A. (1979), 'Mandible of *Chiromyoides minor* (Mammalia, Primates) from the upper Paleocene Chappo member of the Wasatch Formation, Wyoming', *Journal of Paleontology* pp. 550–552.
- Gingerich, P. D. and Haskin, R. A. (1981), 'Dentition of early Eocene *Pelycodus jarrovii* (Mammalia, Primates) and the generic attribution of species formerly referred to *Pelycodus*', *Contr. Mus. Paleont. Univ. Mich* **25**, 327–337.
- Gingerich, P. D., Houde, P. and Krause, D. W. (1983), 'A new earliest Tiffanian (late Paleocene) mammalian fauna from Bangtail Plateau, western Crazy Mountain Basin, Montana', *Journal of Paleontology* pp. 957–970.
- Gingerich, P. D. and Simons, E. L. (1977), *Systematics, phylogeny, and evolution of early Eocene Adapidae (Mammalia, Primates) in North America*, Museum of Paleontology, University of Michigan.
- Gingerich, P. D., Smith, B. H. and Rosenberg, K. (1982), 'Allometric scaling in the dentition of primates and prediction of body weight from tooth size in fossils', *American Journal of Physical Anthropology* **58**(1), 81–100.
- Gittleman, J. L. (1985), 'Carnivore body size: Ecological and taxonomic correlates', *Oecologia* **67**(4), 540–554.
- Godinot, M. and Mahboubi, M. (1992), 'Earliest known simian primate found in Algeria', *Nature* **357**, 324–326.
- Gunnell, G. F. (1985), 'Systematics of early Eocene Microsopininae (Mammalia, Primates) in the Clark's Fork Basin, Wyoming', *Contributions from the Museum of Paleontology* **27**(2), 51–71.
- Gunnell, G. F. (1989), *Evolutionary history of Microsypoidea (Mammalia, Primates) and the relationship between Plesiadapiformes and Primates*, number 27, Museum of Paleontology, University of Michigan.
- Gunnell, G. F. (1992), Wapiti Valley faunas: Early and middle Eocene fossil vertebrates from the North Fork of the Shoshone River, Park County, Wyoming, Technical report, Museum of Paleontology, University of Michigan.
- Gunnell, G. F. (1995a), 'New notharctine (Primates, Adapiformes) skull from the Uintan (middle Eocene) of San Diego County, California', *American Journal of Physical Anthropology* **98**(4), 447–470.
- Gunnell, G. F. (1995b), 'Omomyid primates (Tarsiiformes) from the Bridger Formation, middle Eocene, southern Green River Basin, Wyoming', *Journal of Human Evolution* **28**(2), 147–187.
- Gunnell, G. F. (1998), Mammalian fauna from the Lower Bridger Formation (Bridger A., early middle Eocene) of the southern Green River Basin, Wyoming, Technical report, Museum of Paleontology, University of Michigan.
- Gunnell, G. F. (2002), 'Notharctine primates (Adapiformes) from the early to middle Eocene (Wasatchian-Bridgerian) of Wyoming: transitional species and the origins of Notharctus and Smilodectes', *Journal of Human Evolution* **43**(3), 353–380.
- Gunnell, G. F. and Gingerich, P. D. (1981), 'A new species of *Niptomomys* (Microsypoidea) from the early Eocene of Wyoming', *Folia Primatologica* **36**(1-2), 128–137.
- Hartman, J. E. (1986), 'Paleontology and biostratigraphy of lower part of Polecat Bench Formation, southern Bighorn Basin, Wyoming', *University of Wyoming Contribution to Geology* **24**, 11–64.
- Hodgson, J. A., Sterner, K. N., Matthews, L. J., Burrell, A. S., Jani, R. A., Raaum, R. L., Stewart, C.-B. and Distell, T. R. (2009), 'Successive radiations, not stasis, in the South American primate fauna', *Proceedings of the National Academy of Sciences* **106**(14), 5534–5539.
- Holroyd, P. A. and Strait, S. G. (2008), New data on *Loveina* (Primates: Omomyidae) from the early Eocene Wasatch Formation and implications for Washakiin relationships, in 'Elwyn Simons: A Search for Origins', Springer, pp. 243–257.
- Honey, J. G. (1990), 'New washakiin primates (Omomyidae) from the Eocene of Wyoming and Colorado, and comments on the evolution of the Washakiini', *Journal of Vertebrate Paleontology* **10**(2), 206–221.
- Hunter, J. P., Hartman, J. H. and Krause, D. W. (1997), 'Mammals and mollusks across the Cretaceous-Tertiary boundary from Makoshika State Park and vicinity (Williston Basin), Montana', *Rocky Mountain Geology* **32**(1), 61–114.
- Hunter, J. P. and Pearson, D. A. (1996), 'First record of Lanciaan (late Cretaceous) mammals from the Hell Creek formation of southwestern North Dakota, USA.', *Cretaceous Research* **17**(5), 633–643.
- Jones, K. E., Bielby, J., Cardillo, M., Fritz, S. A., O'Dell, J., Orme, C. D. L., Safi, K., Sechrest, W., Boakes, E. H., Carbone, C., Connolly, C., Cutts, M. J., Foster, J. K., Grenyer, R., Habib, M., Plaster, C. A., Price, S. A., Rigby, E. A., Rist, J., Teacher, A., Bininda-Emonds, O. R. P., Gittleman, J. L., Mace, G. M. and Purvis, A. (2009), 'Pantheria: A species-level database of life history, ecology, and geography of extant and recently extinct mammals', *Ecology* **90**(9), 2648.
- Jungers, W. L. (1985), Body size and scaling of limb proportions in primates, in 'Size and scaling in primate biology', Springer, pp. 345–381.
- Kappelman, J. (1996), 'The evolution of body mass and relative brain size in fossil hominids', *Journal of Human Evolution* **30**(3), 243–276.
- Kay, R. F. (2015), 'Biogeography in deep time - What do phylogenetics, geology, and paleoclimate tell us about early platyrrhine evolution?', *Molecular Phylogenetics and Evolution* **82**, 358–374.
- Kay, R. F., Williams, B. A., Ross, C. F., Takai, M. and Shigehara, N. (2004), Anthropoid origins: A phylogenetic analysis, in 'Anthropoid Origins', Springer, pp. 91–135.
- Kelly, T. S. and Whistler, D. P. (1994), 'Additional Uintan and Duchesnean (middle and late Eocene) mammals from the Sespe Formation, Simi Valley, California', *Contributions*

*in Science/Natural History Museum of Los Angeles County*

- 1230 Kihm, A. (1992), 'Two new species of adapid primates from the late Wasatchian of northwestern Colorado', *Hunteria* **3**, 1–6.
- Kihm, A. J. (1984), Early Eocene mammalian faunas of the Piceance Creek basin, northwestern Colorado, PhD thesis, University of Colorado.
- 1235 King, T., Aiello, L. C. and Andrews, P. (1999), 'Dental microwear of *Griphopithecus alpani*', *Journal of Human Evolution* **36**(1), 3–31.
- 1240 Kirk, E. C. and Williams, B. A. (2011), 'New adapiform primate of Old World affinities from the Devils Graveyard Formation of Texas', *Journal of Human Evolution* **61**(2), 156–168.
- Kleiber, M. (1947), 'Body size and metabolic rate', *Physiological Reviews* **27**(4), 511–541.
- 1245 Kozłowski, J. and Gawelczyk, A. T. (2002), 'Why are species' body size distributions usually skewed to the right?', *Functional Ecology* **16**, 419–432.
- Krause, D. W. (1978), 'Paleocene primates from western Canada', *Canadian Journal of Earth Sciences* **15**(8), 1250–1271.
- Krause, D. W. and Gingerich, P. D. (1983), Mammalian fauna from Douglass Quarry, earliest Tiffanian (late Paleocene) of the eastern Crazy Mountain Basin, Montana, Technical report, Museum of Paleontology, University of Michigan.
- 1255 Krishtalka, L. (1978), 'Paleontology and geology of the Badwater Creek area, central Wyoming. Part 15. Review of the late Eocene primates from Wyoming and Utah, and the Plesitarsiiformes', *Annals of the Carnegie Museum* **47**(15), 335–359.
- 1260 Krishtalka, L., Black, C. C. and Riedel, D. W. (1975), 'Paleontology and geology of the Badwater Creek area, central Wyoming. Part 10. A late Paleocene mammal fauna from the Shotgun Member of the Fort Union Formation', *Annals of the Carnegie Museum* **45**, 179–212.
- 1265 Lande, R. (1979), 'Quantitative genetic analysis of multivariate evolution, applied to brain:body size allometry', *Evolution* **33**(1), 402–416.
- 1270 Leonard, W. R. and Robertson, M. L. (1994), 'Evolutionary perspectives on human nutrition: The influence of brain and body size on diet and metabolism', *American Journal of Human Biology* **6**(1), 77–88.
- Leonard, W. R., Robertson, M. L., Snodgrass, J. J. and Kuzawa, C. W. (2003), 'Metabolic correlates of hominid brain evolution', *Comparative Biochemistry and Physiology Part A: Molecular & Integrative Physiology* **136**(1), 5–15.
- 1275 Lillegraven, J. A. (1980), 'Primates from later Eocene rocks of southern California', *Journal of Mammalogy* **61**(2), 181–204.
- 1280 Lucas, P., Constantino, P., Wood, B. and Lawn, B. (2008), 'Dental enamel as a dietary indicator in mammals', *BioEssays* **30**(4), 374–385.
- MacPhee, R. and Iturralde-Vinent, M. A. (1995), 'Earliest monkey from Greater Antilles', *Journal of Human Evolution* **28**, 197–200.
- 1285 Manson, J. H., Wrangham, R. W., Boone, J. L., Chapais, B., Dunbar, R. I. M., Ember, C. R., Irons, W., Marchant, L. F., McGrew, W. C., Nishida, T., Paterson, J. D., Smith, E. A., Stanford, C. B. and M., W. C. (1991), 'Intergroup aggression in chimpanzees and humans [and comments and replies]', *Current Anthropology* **32**(4), 369–390.
- Martin, A. P. and Palumbi, S. R. (1993), 'Body size, metabolic rate, generation time, and molecular clock', *Proceedings of the National Academy of Sciences* **90**(9), 4087–4091.
- 1295 Martin, R. D. and Harvey, P. H. (1985), Brain size allometry ontogeny and phylogeny, in 'Size and scaling in primate biology', Springer, pp. 147–173.
- Mason, M. A. (1990), *New fossil primates from the Uintan (Eocene) of southern California*, Museum of Paleontology, University of California.
- McGrew, P. O. and Patterson, B. (1962), *A Picrodontid insectivore from the Paleocene of Wyoming*, Museum of Comparative Zoology.
- McGrew, P. O. and Sullivan, R. (1971), 'The stratigraphy and paleontology of Bridger A, Wyoming', *University Contributions to Geology* **9**, 66–85.
- 1305 McKenna, M. C. (1960), *Fossil Mammalia from the early Wasatchian Four Mile fauna, Eocene of northwest Colorado*, University of California Press.
- 1310 McKenna, M. C. (1990), 'Plagiomenids (Mammalia: Dermoptera) from the Oligocene of Oregon, Montana, and South Dakota, and middle Eocene of northwestern Wyoming', *Geological Society of America Special Papers* **243**, 211–234.
- 1315 McShea, D. W. (1994), 'Mechanisms of large-scale evolutionary trends', *Evolution* **48**, 1747–1763.
- Mitani, J. C., Watts, D. P. and Amstler, S. J. (2010), 'Lethal intergroup aggression leads to territorial expansion in wild chimpanzees', *Current Biology* **20**(12), R507–R508.
- 1320 Mootnick, A. and Groves, C. (2005), 'A new generic name for the hoolock gibbon (Hylobatidae)', *International Journal of Primatology* **26**(4), 971–976.
- Muldoon, K. M. and Gunnell, G. F. (2002), 'Omomyid primates (Tarsiiformes) from the early middle Eocene at South Pass, Greater Green River Basin, Wyoming', *Journal of Human Evolution* **43**(4), 479–511.
- 1325 Murphey, P. C. and Dunn, R. H. (2009), 'Hemiacodon engardae, a new species of omomyid primate from the earliest Uintan Turtle Bluff Member of the Bridger Formation, southwestern Wyoming, USA', *Journal of Human Evolution* **57**(2), 123–130.
- 1330 Ottoni, E. B. and Izar, P. (2008), 'Capuchin monkey tool use: Overview and implications', *Evolutionary Anthropology: Issues, News, and Reviews* **17**(4), 171–178.
- 1335 Pearson, O. P. (1948), 'Metabolism of small mammals, with remarks on the lower limit of mammalian size', *Science* **108**, 44.
- Perez, S. I., Tejedor, M. F., Novo, N. M. and Aristide, L. (2013), 'Divergence times and the evolutionary radiation of New World monkeys (Platyrrhini, Primates): An analysis of fossil and molecular data', *PLoS One* **8**(6), e68029.
- 1340 Qi, G., Dong, W., Zheng, L., Zhao, L., Gao, F., Yue, L. and Zhang, Y. (2006), 'Taxonomy, age and environment status of the Yuanmou hominoids', *Chinese Science Bulletin* **51**(6), 704–712.

- Rasmussen, D. T., Shekelle, M., Walsh, S. L. and Riney, B. O. (1995), 'The dentition of *Dyseolemur*, and comments on the use of the anterior teeth in primate systematics', *Journal of Human Evolution* **29**(4), 301–320.
- 1350 Rasmussen, T. D. (1996), 'A new middle Eocene omomyine primate from the Uinta Basin, Utah', *Journal of Human Evolution* **31**(1), 75–87.
- Rasmussen, T. and Nekaris, K. (1998), 'Evolutionary history of lorisiform primates', *Folia Primatologica* **69**(Suppl. 1), 250–285.
- 1355 Rigby, J. K. (1980), *Swain Quarry of the Fort Union Formation, middle Paleocene (Torrejonian), Carbon County, Wyoming, geologic setting and mammalian fauna*, Vol. 3, Evolutionary Monographs, University of Chicago.
- 1360 Robinson, P. (1968), 'The paleontology and geology of the Badwater Creek area, central Wyoming. Part 4. Late Eocene primates from Badwater, Wyoming, with a discussion of material from Utah', *Annals of the Carnegie Museum* **39**, 307–326.
- 1365 Robinson, P. (1994), 'Myrmekomomys, a new genus of Micromomyine (Mammalia, Microsypidae) from the lower Eocene rocks of the Powder River Basin, Wyoming', *Rocky Mountain Geology* **30**(1), 85–90.
- 1425 Rose, K. D. (1981), *The Clarkforkian land-mammal age and mammalian faunal composition across the Paleocene-Eocene boundary*, number 26, Museum of Paleontology, University of Michigan Ann Arbor, MI.
- 1370 Rose, K. D. (1995), 'Anterior dentition and relationships of the early Eocene omomyids *Arapahovius advena* and *Teilhardina demissa*, sp. nov.', *Journal of Human Evolution* **28**(3), 231–244.
- 1375 Rose, K. D., Beard, K. C. and Houde, P. (1993), 'Exceptional new dentitions of the diminutive plesiadapiforms *Tinimomys* and *Niptomomys* (Mammalia), with comments on the upper incisors of Plesiadapiformes', *Annals of Carnegie Museum* **62**, 351–361.
- 1380 Rose, K. D. and Bown, T. M. (1982), 'New plesiadapiform primates from the Eocene of Wyoming and Montana', *Journal of Vertebrate Paleontology* **2**(1), 63–69.
- 1440 Rose, K. D. and Bown, T. M. (1991), 'Additional fossil evidence on the differentiation of the earliest Euprimates', *Proceedings of the National Academy of Sciences* **88**(1), 98–101.
- 1385 Rose, K. D. and Bown, T. M. (1996), 'A new plesiadapiform (Mammalia: Plesiadapiformes) from the early Eocene of the Bighorn Basin, Wyoming', *Annals of Carnegie Museum* **65**(3), 305–321.
- 1390 Rose, K. D. and Gingerich, P. D. (1976), *Partial skull of the plesiadapiform primate *Ignacius* from the early Eocene of Wyoming*, Museum of Paleontology, University of Michigan.
- 1450 Rose, K. D., MacPhee, R. D. E. and Alexander, J. P. (1999), 'Skull of early Eocene *Cantius abditus* (Primates: Adapiformes) and its phylogenetic implications, with a reevaluation of "*Hesperolemur*" *actius*', *American Journal of Physical Anthropology* **109**, 523–539.
- 1395 Savage, V. M., Gillooly, J. F., Brown, J. H., West, G. B. and Charnov, E. L. (2004), 'Effects of body size and temperature on population growth', *American Naturalist* **163**(3), 429–441.
- 1400 Schiebout, J. (1974), 'Vertebrate paleontology and paleoecology of Paleocene Black Peaks Formation, Big Bend National Park, Texas', *Texas Memorial Museum Bulletin* **24**.
- Scott, C. S. (2003), 'Late Torrejonian (middle Paleocene) mammals from south central Alberta, Canada', *Journal of Paleontology* **77**(04), 745–768.
- 1410 Scott, C. S., F. R. C. and Redman, C. M. (2016), 'A new species of the basal plesiadapiform *Purgatorius* (Mammalia, Primates) from the early Paleocene Ravenscrag Formation, Cypress Hills, southwest Saskatchewan, Canada: Further taxonomic and dietary diversity in the earliest primates', *Canadian Journal of Earth Sciences* **53**(4), 343–354.
- Scott, C. S. and Fox, R. C. (2005), 'Windows on the evolution of *Picrodus* (Plesiadapiformes: Primates): morphology and relationships of a species complex from the Paleocene of Alberta', *Journal of Paleontology* **79**(4), 635–657.
- 1420 Shigehara, N., Takai, M., Kay, R. F., Aung, A. K., Soe, A. N., Tun, S. T., Tsubamoto, T. and Thein, T. (2002), 'The upper dentition and face of *Pondaungia cotteri* from central Myanmar', *Journal of Human Evolution* **43**(2), 143–166.
- Shoemaker, L. G. and Clauset, A. (2014), 'Body mass evolution and diversification within horses (family Equidae)', *Ecology letters* **17**(2), 211–220.
- Shultz, S. and Dunbar, R. (2010), 'Encephalization is not a universal macroevolutionary phenomenon in mammals but is associated with sociality', *Proceedings of the National Academy of Sciences* **107**(50), 21582–21586.
- 1430 Shultz, S. and Dunbar, R. I. M. (2007), 'The evolution of the social brain: Anthropoid primates contrast with other vertebrates', *Proceedings of the Royal Society of London B: Biological Sciences* **274**(1624), 2429–2436.
- 1435 Silcox, M. T. (2001), A phylogenetic analysis of the Plesiadapiformes and their relationship to Euprimates and other archontans, PhD thesis.
- Silcox, M. T. (2007), Primate taxonomy, plesiadapiforms, and approaches to primate origins, in 'Primate origins: Adaptations and evolution', Springer, pp. 143–178.
- Simons, E. L. (1961), *The dentition of Ourayia: Its bearing on relationships of omomyid prosimians*, Peabody Museum of Natural History.
- Simpson, G. G. (1935), 'The Tiffany fauna, upper Paleocene', *American Museum Novitates* pp. 1–19.
- 1445 Simpson, G. G. (1936), 'Studies of the earliest mammalian dentitions', *The Dental Cosmos* **78**, 791–800.
- Simpson, G. G. (1937), *The Fort Union of the Crazy Mountain field, Montana and its mammalian faunas*, Vol. 169, US Govt. print. off.
- Smith, F. A., Brown, J. H., Haskell, J., Lyons, S., Alroy, J. and Charnov, E. (2002), 'Similarity of mammalian body size across the taxonomic hierarchy and across space and time', *American Naturalist* **163**, 672–691.
- 1455 Smith, F. A. and Lyons, S. K. (2011), 'How big should a mammal be? A macroecological look at mammalian body size over space and time', *Phil. Trans. R. Soc. B* **366**, 2364–2378.
- Stirton, R. A. (1951), *Ceboid monkeys from the Miocene of Colombia*, University of California Press Berkeley.
- 1460 Stirton, R. A. and Savage, D. E. (1949), 'A new monkey from the La Venta Miocene of Columbia', *Compd. Estud. Geol.*



- Ofic. Colombia* **8**, 345–356.
- Stock, C. (1934), ‘Microsopsinae and Hyopsodontidae in the Sesepe Upper Eocene, California’, *Proceedings of the National Academy of Sciences* **20**(6), 349–354.
- Storer, J. E. (1990), ‘Primates of the Lac Pelletier Lower Fauna (Eocene: Duchesnean), Saskatchewan’, *Canadian Journal of Earth Sciences* **27**(4), 520–524.
- Swindler, D. R. (2002), *Primate dentition: An introduction to the teeth of non-human primates*, Cambridge University Press.
- Szalay, F. S. (1969), ‘Mixodectidae, Microsopidae, and the insectivore-primate transition’, *Bulletin of the American Museum of Natural History* **140**(4).
- Szalay, F. S. (1976), *Systematics of the Omomyidae (Tarsiiformes, Primates) taxonomy, phylogeny, and adaptations*, American Museum of Natural History.
- Takai, M. and Anaya, F. (1996), ‘New specimens of the oldest fossil platyrrhine, *Branisella boliviana*, from Salla, Bolivia’, *American Journal of Physical Anthropology* **99**(2), 301–317.
- Tavaré, S., Marshall, C. R., Will, O., Soligo, C. and Martin, R. D. (2002), ‘Using the fossil record to estimate the age of the last common ancestor of extant primates’, *Nature* **416**(6882), 726–729.
- Tejedor, M. F., Rosenberger, A. L. and Cartelle, C. (2008), ‘Nueva especie de *Alouatta* (Primates, Atelinae) del Pleistoceno Tardío de Bahía, Brasil’, *Ameghin* **45**, 247–251.
- Tomiya, S. (2013), ‘Body size and extinction risk in terrestrial mammals above the species level’, *American Naturalist* **182**(6), E196–E214.
- Van Schaik, C. P. (1996), ‘Social evolution in primates: The role of ecological factors and male behaviour’, *Proceedings of the British Academy* **88**, 9–31.
- Van Schaik, C. P. and Van Hooff, J. (1983), ‘On the ultimate causes of primate social systems’, *Behaviour* **85**(1), 91–117.
- Van Valen, L. M. (1994), *The origin of the plesiadapid primates and the nature of Purgatorius*, University of Chicago Press.
- Van Valen, L. and Sloan, R. E. (1965), ‘The earliest primates’, *Science* **150**(3697), 743–745.
- Wasserman, L. (2002), *All of statistics. A concise course in statistical inference*, Springer.
- West, G. B., Woodruff, W. H. and Brown, J. H. (2002a), ‘Allometric scaling of metabolic rate from molecules and mitochondria to cells and mammals’, *Proc. Natl. Acad. Sci. (USA)* **99**, 2473–2478.
- West, G. B., Woodruff, W. H. and Brown, J. H. (2002b), ‘Allometric scaling of metabolic rate from molecules and mitochondria to cells and mammals’, *Proceedings of the National Academy of Sciences* **99**(suppl 1), 2473–2478.
- West, R. M. (1973), *Geology and mammalian paleontology of the New Fork-Big Sandy area, Sublette County, Wyoming*, Vol. 1161, Field Museum of Natural History.
- West, R. M. (2015), *Fossil mammals from the Lower Buck Hill group Eocene of Trans-Pecos Texas*, Texas Memorial Museum, The University of Texas at Austin.
- Wible, J. R. and Covert, H. H. (1987), ‘Primates: Cladistic diagnosis and relationships’, *Journal of Human Evolution* **16**(1), 1–22.
- Williams, B. A. and Kirk, E. C. (2008), ‘New Uintan primates from Texas and their implications for North American patterns of species richness during the Eocene’, *Journal of Human Evolution* **55**(6), 927–941.
- Williams, F. L., Ackermann, R. R. and Leigh, S. R. (2007), ‘Inferring Plio-Pleistocene southern African biochronology from facial affinities in *Parapapio* and other fossil papionins’, *American Journal of Physical Anthropology* **132**(2), 163–174.
- Winterfeld, G. F. (1982), ‘Mammalian paleontology of the Fort Union Formation (Paleocene), eastern Rock Springs Uplift, Sweetwater County, Wyoming’, *Rocky Mountain Geology* **21**(1), 73–111.
- Wood, C. B., Conroy, G. C. and Lucas, S. G. (1979), ‘New discoveries of fossil primates from the type Torrejonian (Middle Paleocene) of New Mexico’, *Folia Primatologica* **32**(1-2), 1–7.
- Zachos, J., Pagani, M., Sloan, L., Thomas, E. and Billups, K. (2001), ‘Trends, rhythms, and aberrations in global climate 65 ma to present’, *Science* **292**(5517), 686–693.
- Zinner, D., Fickenschner, G., Roos, C., Mittermeier, R. A., Rylands, A. B. and Wilson, D. E. (2013), ‘Handbook of the mammals of the world’.
- Zonneveld, J.-P., Gunnell, G. F. and Bartels, W. S. (2000a), ‘Early Eocene fossil vertebrates from the southwestern Green River Basin, Lincoln and Uinta Counties, Wyoming’, *Journal of Vertebrate Paleontology* **20**(2), 369–386.
- Zonneveld, J.-P., Gunnell, G. F. and Bartels, W. S. (2000b), ‘Early Eocene fossil vertebrates from the southwestern Green River Basin, Lincoln and Uinta Counties, Wyoming’, *Journal of Vertebrate Paleontology* **20**(2), 369–386.
